# Supplementary material for: Phosphoproteomic differences in major depressive disorder postmortem brains indicate effects on synaptic function
Source: Springer Nature journal article supplement (doi:10.1007/s00406-012-0301-3), 2012-02-20

Supplemental Material 1: Patients' demographics. TOD= time of death;

| Diagnostic          | Age | Gender | Cause Of Death    | Post mortem interval | Brain pH | Age On Onset | Alcohol Use             | Drug Use                | Smoking At TOD | Mood Stabilizer (being taken at TOD) | Lifetime Antipsychotics            | Antidepressant    |
|---------------------|-----|--------|-------------------|----------------------|----------|--------------|-------------------------|-------------------------|----------------|--------------------------------------|------------------------------------|-------------------|
| DEPRESSIVE DISORDER | 53  | Male   | CARDIAC           | 21                   | 6.64     | 45           | Insufficient info       | Moderate in the past    | Unknown        |                                      |                                    |                   |
| DEPRESSIVE DISORDER | 45  | Male   | SUIC: HANGING     | 29                   | 6.75     | 30           | Moderate in the past    | Little or none          | No             |                                      |                                    | TRAZODONE         |
| DEPRESSIVE DISORDER | 56  | Female | BURNS             | 15                   | 6.59     | 25           | Social                  | Heavy in the past       | No             |                                      |                                    | Insufficient info |
| DEPRESSIVE DISORDER | 24  | Male   | SUIC: OVERDOSE    | 21                   | 6.61     | 14           | Insufficient info       | Insufficient info       | Yes            | GABAPENTIN                           | Insufficient info                  | VENLAFAXINE       |
| DEPRESSIVE DISORDER | 45  | Female | SUIC: OVERDOSE    | 13                   | 6.58     | 37           | Heavy in the past       | Moderate in the present | Unknown        | GABAPENTIN                           | 100 (QUETIAPINE)                   | BUPROPION         |
| DEPRESSIVE DISORDER | 33  | Male   | SUIC: HANGING     | 25                   | 6.86     | 17           | Social                  | Moderate in the past    | Unknown        | VALPROATE                            |                                    |                   |
| DEPRESSIVE DISORDER | 56  | Male   | SUIC: OVERDOSE    | 38                   | 6.59     | 51           | Moderate in the present | Little or none          | No             |                                      | 1000 (RISPERIDONE)                 | VENLAFAXINE       |
| DEPRESSIVE DISORDER | 32  | Female | SUIC: HANGING     | 19                   | 6.8      | 32           | Little or none          | Little or none          | Unknown        |                                      |                                    | TRAZODONE         |
| DEPRESSIVE DISORDER | 44  | Male   | CARDIAC           | 24                   | 6.52     | 31           | Social                  | Little or none          | Unknown        | VALPROATE                            | 3000 (CHLORPROMAZINE & OLANZAPINE) | BUPROPION         |
| DEPRESSIVE DISORDER | 34  | Male   | SUIC: FALLING     | 24                   | 6.79     | 14           | Heavy in the present    | Little or none          | Unknown        |                                      |                                    | FLUOXETINE        |
| DEPRESSIVE DISORDER | 45  | Female | CARDIAC           | 29                   | 6.9      | 27           | Little or none          | Little or none          | Unknown        |                                      |                                    | SERTRALINE        |
| DEPRESSIVE DISORDER | 47  | Female | SUIC: GUNSHOT     | 25                   | 6.88     | 44           | Little or none          | Little or none          | No             |                                      |                                    | BUPROPION         |
| DEPRESSIVE DISORDER | 28  | Male   | SUIC: HANGING     | 26                   | 6.7      | 20           | Little or none          | Little or none          | Yes            |                                      | 3000 (RISPERIDONE)                 | FLUOXETINE        |
| DEPRESSIVE DISORDER | 36  | Female | PULM EMBOL        | 32                   | 6.74     | 25           | Social                  | Insufficient info       | Yes            |                                      | 2500 (RISPERIDONE)                 | TRAZODONE         |
| DEPRESSIVE DISORDER | 32  | Female | SUIC: HANGING     | 19                   | 6.7      | 22           | Heavy in the present    | Moderate in the present | Unknown        |                                      | 100                                |                   |
| DEPRESSIVE DISORDER | 48  | Female | SUIC: OVERDOSE    | 24                   | 6.36     | 39           | Social                  | Little or none          | Yes            |                                      | 6500 (THIOTHIXENE)                 | DESIPRAMINE       |
| DEPRESSIVE DISORDER | 63  | Male   | SUIC: HANGING     | 31                   | 6.6      | 59           | Heavy in the past       | Little or none          | No             |                                      | 4000                               | NEFAZODONE        |
| DEPRESSIVE DISORDER | 40  | Female | SUIC: HANGING     | 49                   | 6.72     | 25           | Insufficient info       | Heavy in the past       | Unknown        |                                      | 1000                               | VENLAFAXINE       |
| DEPRESSIVE DISORDER | 51  | Female | UNKNOWN           | 36                   | 6.3      | 30           | Social                  | Little or none          | Unknown        | LITHIUM                              | 700                                | TRANLYCYPROMINE   |
| DEPRESSIVE DISORDER | 35  | Male   | SUIC: HANGING     | 19                   | 6.6      | 32           | Little or none          | Little or none          | Unknown        |                                      | 2000                               |                   |
| DEPRESSIVE DISORDER | 28  | Female | SUIC: OVERDOSE    | 40                   | 6.68     | 13           | Moderate in the past    | Little or none          | Yes            |                                      | Insufficient info                  |                   |
| DEPRESSIVE DISORDER | 35  | Male   | SUIC: GUNSHOT     | 36                   | 6.6      | 18           | Heavy in the present    | Moderate in the present | Unknown        |                                      |                                    |                   |
| DEPRESSIVE DISORDER | 40  | Male   | OVERDOSE          | 52                   | 6.48     | 32           | Heavy in the present    | Heavy in the past       | No             | LITHIUM & VALPROATE                  | 3000 (QUETIAPINE)                  |                   |
| DEPRESSIVE DISORDER | 62  | Male   | SUIC: STABBED     | 65                   | 6.57     | 35           | Heavy in the present    | Little or none          | Unknown        |                                      |                                    | NEFAZODONE        |
| CONTROL             | 34  | Male   | CAR ACCIDENT      | 9                    | 6.56     | N/A          | Little or none          | Little or none          | Yes            | 0                                    | 0                                  | 0                 |
| CONTROL             | 50  | Male   | CARDIAC           | 11                   | 6.5      | N/A          | Social                  | Social                  | Unknown        | 0                                    | 0                                  | 0                 |
| CONTROL             | 24  | Male   | CAR ACCIDENT      | 17                   | 6.6      | N/A          | Heavy in the past       | Heavy in the past       | Unknown        | 0                                    | 0                                  | 0                 |
| CONTROL             | 50  | Female | CARDIAC           | 35                   | 6.31     | N/A          | Little or none          | Little or none          | Yes            | 0                                    | 0                                  | 0                 |
| CONTROL             | 39  | Female | CARDIAC           | 24                   | 6.88     | N/A          | Little or none          | Little or none          | Unknown        | 0                                    | 0                                  | 0                 |
| CONTROL             | 56  | Female | CARDIAC           | 29                   | 6.78     | N/A          | Little or none          | Little or none          | No             | 0                                    | 0                                  | 0                 |
| CONTROL             | 48  | Male   | CARDIAC           | 12                   | 6.51     | N/A          | Heavy in the past       | Social                  | No             | 0                                    | 0                                  | 0                 |
| CONTROL             | 44  | Male   | ALCOHOL POISONING | 27                   | 6.82     | N/A          | Heavy in the present    | Moderate in the present | Unknown        | 0                                    | 0                                  | 0                 |
| CONTROL             | 35  | Male   | CAR ACCIDENT      | 31                   | 6.59     | N/A          | Moderate in the present | Little or none          | Yes            | 0                                    | 0                                  | 0                 |
| CONTROL             | 63  | Male   | CARDIAC           | 40                   | 6.91     | N/A          | Heavy in the past       | Little or none          | No             | 0                                    | 0                                  | 0                 |
| CONTROL             | 56  | Female | OBESITY-RELATED   | 31                   | 6.66     | N/A          | Heavy in the past       | Little or none          | Yes            | 0                                    | 0                                  | 0                 |
| CONTROL             | 63  | Male   | CARDIAC           | 37                   | 6.5      | N/A          | Little or none          | Little or none          | Unknown        | 0                                    | 0                                  | 0                 |

Supplemental Material 1: PCA analysis according to mood stabilizer medication and lifetime antipsychotics

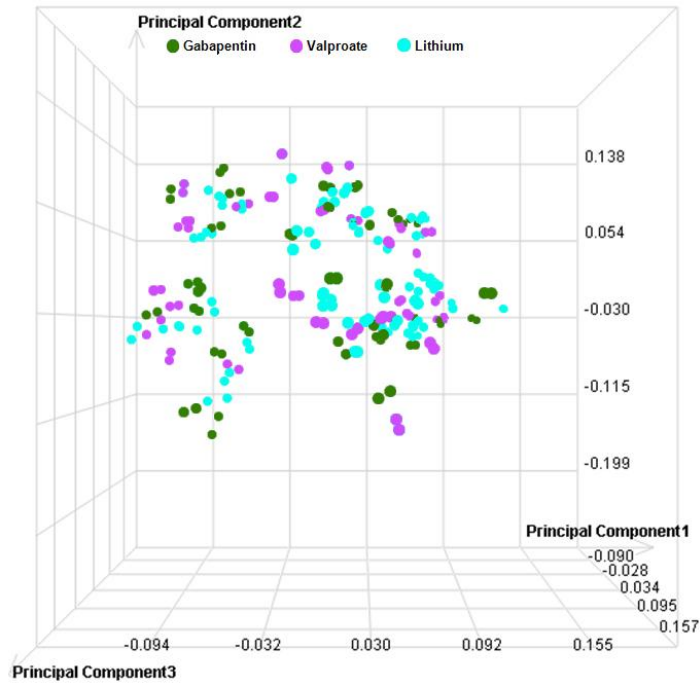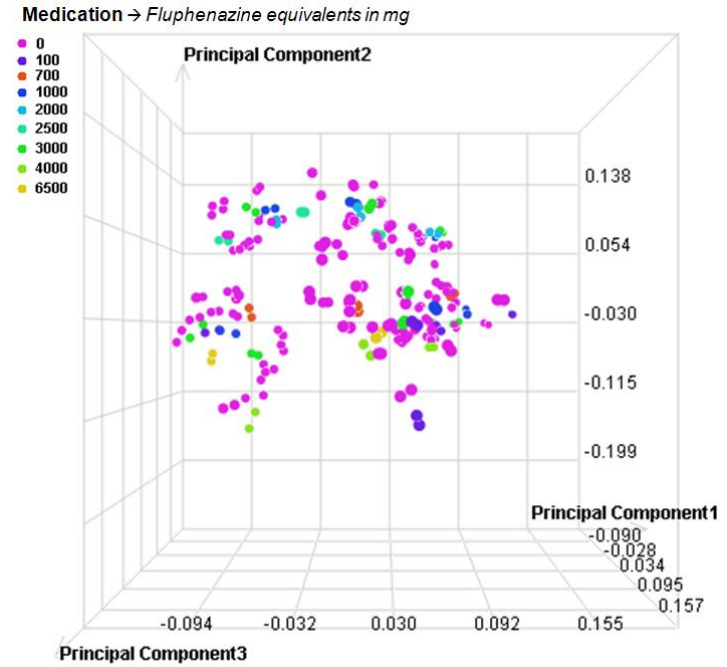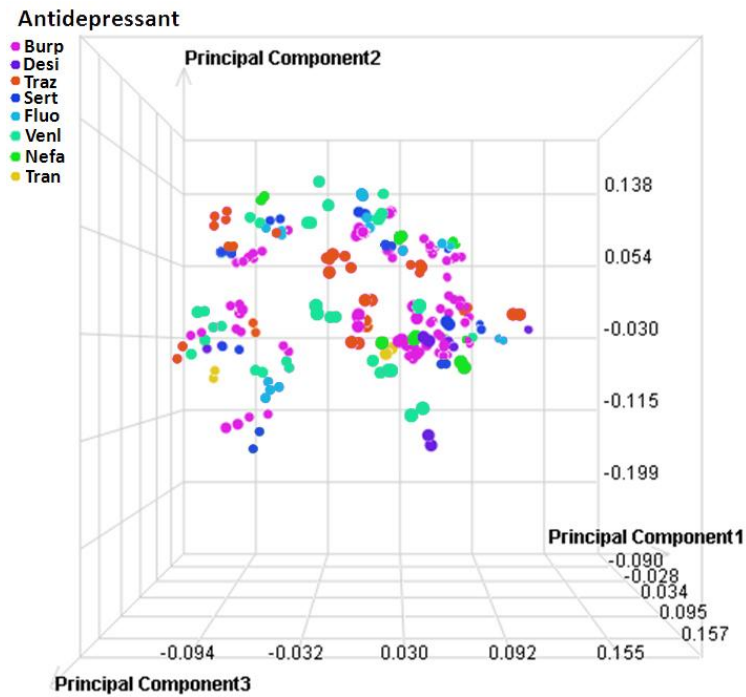

Supplement: MOESM1 [file 8440588]
